# Supplementary material for: Utilization of softwood lignin as both crosslinker and reinforcing agent in silicone elastomers
Source: Royal Society of Chemistry journal article supplement (doi:10.1039/c4gc02409e), 2015-01-01
Supplement: c4gc02409e1.pdf [file c4gc02409e1.pdf]

## Utilization of softwood lignin as both crosslinker and reinforcing agent in silicone elastomers

Jianfeng Zhang,<sup>a</sup> Yang Chen,<sup>a</sup> Paul Sewell<sup>a</sup> and Michael. A. Brook,<sup>\*a</sup>

*Electronic Supporting Information*

### Equipment associated with titration of the lignin surface:

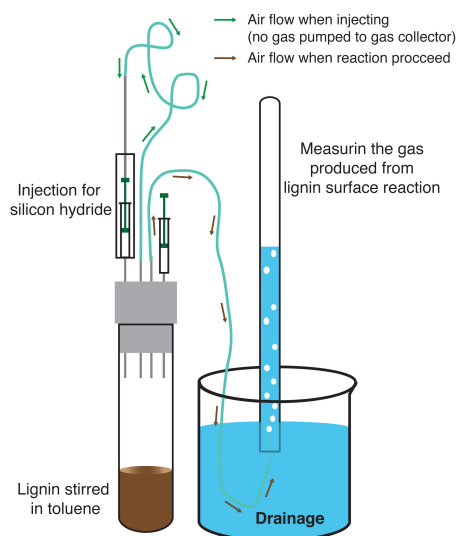

**Scheme S1.** The water displacement method for gas production measurement.

### Chemistry associated with titration of the lignin surface:

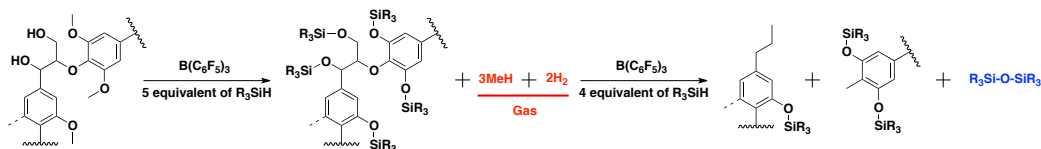

Without considering the reactivity of each functional groups

**Scheme S2.** The molar ratio of reactive surface functional group to gaseous by-product (5 equiv./4 equiv.)

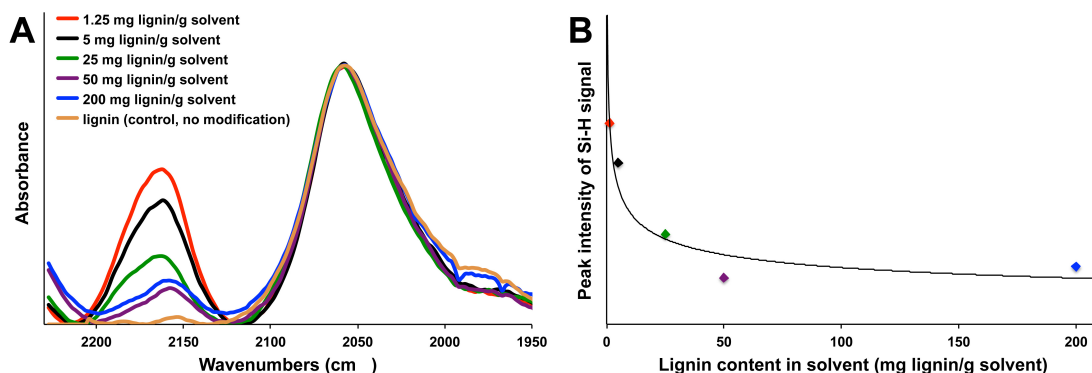

**Figure S1.** The DRIFT-IR spectrum for lignin particles titrated with different concentration in solvent. (A) and (B) The intensity of “Si-H” peak dropped with the increasing of lignin content in solvent (mg lignin/g solvent).

**Demonstrated calculation for optimal formulations: balancing available functional group on lignin with [SiH]:**

1. The equivalence of hydride:
  - If 800 mg of lignin was require in 1000 mg of DMS-H31 for ~ 40% weight ratio
  - The hydride that lignin could consume:  $800 \text{ mg} \times 0.8 \text{ } \mu\text{mol/mg} \times 2 = 1280 \text{ } \mu\text{mol}$  (Note, the reason for “ $\times 2$ ” refers to **Scheme S2**).
2. The hydride of DMS-H31:
  - If 1000 mg of DMS-H31 was required
  - The hydride content:  $1000 \text{ mg} \times 0.07 \text{ } \mu\text{mol/mg} = 70 \text{ } \mu\text{mol}$
3. The 70  $\mu\text{mol}$  of hydride is not enough for 1280  $\mu\text{mol}$  equivalence hydride required for lignin surface reaction, therefore, a co-crosslinker (HMS-301, 501, or 992) was required.
4. The hydride required to be provide by HMS-992:
  - If hydride to reactive surface functional group on lignin was set to 1/2  
 The hydride required by HMS-992 =  $(1280 - 70 \times 2)/2 = 570 \text{ } \mu\text{mol}$   
 The mass of HMS-992 required =  $570 \text{ } \mu\text{mol}/16.67 \text{ } \mu\text{mol/mg} = 34.2 \text{ mg}$
  - If hydride to reactive surface functional group on lignin was set to 2/1  
 The hydride required by HMS-992 =  $1280 \times 2 - 70 = 2490 \text{ } \mu\text{mol}$   
 The mass of HMS-992 required =  $2490 \text{ } \mu\text{mol}/16.67 \text{ } \mu\text{mol/mg} = 149.4 \text{ mg}$
  - If hydride to reactive surface functional group on lignin was set to 4/1  
 The hydride required by HMS-992 =  $1280 \times 4 - 70 = 5050 \text{ } \mu\text{mol}$   
 The mass of HMS-992 required =  $5050 \text{ } \mu\text{mol}/16.67 \text{ } \mu\text{mol/mg} = 302 \text{ mg}$

**Table S1.** Example formulation of lignin (SKL from Weyerhaeuser, 40.9%) as crosslinker/reinforcement in silicone elastomer. a co-crosslinker (HMS-992) was used for keeping the chemical stoichiometry of hydride to surface functional group of lignin close to 1:1.

| Lignin (mg) | DMS-H31 (mg) | HMS-992 (mg) |
|-------------|--------------|--------------|
| 800         | 1000         | 34           |
|             |              | 150          |
|             |              | 302          |

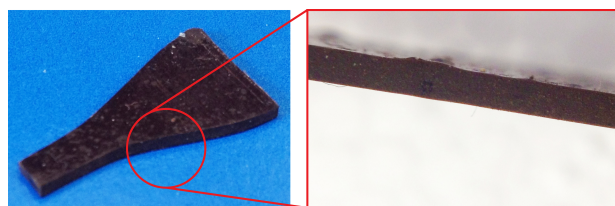

**Figure S2.** Images of bubble lignin/silicone elastomers made without solvent, right image is the cross-section of elastomer.

**Table S2.** The hydride content of hydride functionalized silicone with different chemical structures

|         | Mw (g/mol) | Chemical structure                                                                                                   | Hydride content [Si-H], $\mu\text{mol/mg}$ |
|---------|------------|----------------------------------------------------------------------------------------------------------------------|--------------------------------------------|
| DMS-H11 | 1175       | $\text{H}-\text{Si}(\text{O})_2-\left(\text{Si}(\text{O})_2\right)_n-\text{Si}-\text{H}$                             | 1.70                                       |
| DMS-H21 | 6000       |                                                                                                                      | 0.33                                       |
| DMS-H31 | 28000      |                                                                                                                      | 0.07                                       |
| DMS-H41 | 62700      |                                                                                                                      | 0.03                                       |
| HMS-301 | 1900-2100  | $\text{Si}(\text{O})_2-\left(\text{Si}(\text{O})_2\right)_m-\left(\text{Si}(\text{O})_2\right)_n-\text{Si}-\text{H}$ | 4.36                                       |
| HMS-501 | 900-1200   |                                                                                                                      | 7.46                                       |
| HMS-992 | 1800-2100  |                                                                                                                      | 16.67                                      |

#### Solvent resistance:

**Table S3.** Solvent resistance of lignin-C/R-elastomer to organic solvents and water

|                                         | DMSO   | MeOH   | H <sub>2</sub> O | Acetone | IPA    | THF    | THF/DMSO (1:1) | Toluene |
|-----------------------------------------|--------|--------|------------------|---------|--------|--------|----------------|---------|
| Initial (g)                             | 0.0285 | 0.0244 | 0.0275           | 0.0224  | 0.0218 | 0.0282 | 0.0203         | 0.0270  |
| Swelling (g)                            | 0.0748 | 0.0396 | 0.0334           | 0.0409  | 0.0315 | 0.0860 | 0.0332         | 0.0466  |
| Swelling ratio (%)                      | 162    | 62     | 21               | 83      | 44     | 205    | 64             | 73      |
| After extraction (g)                    | 0.0289 | 0.0237 | 0.0285           | 0.0231  | 0.0249 | 0.0212 | 0.0155         | 0.0257  |
| Weight gain/loss ratio (%) <sup>a</sup> | 1      | -3     | 4                | 3       | 14     | -25    | -24            | -5      |

<sup>a</sup> The “-” means a weight loss percentage (loss weight/original weight  $\times$  100%).

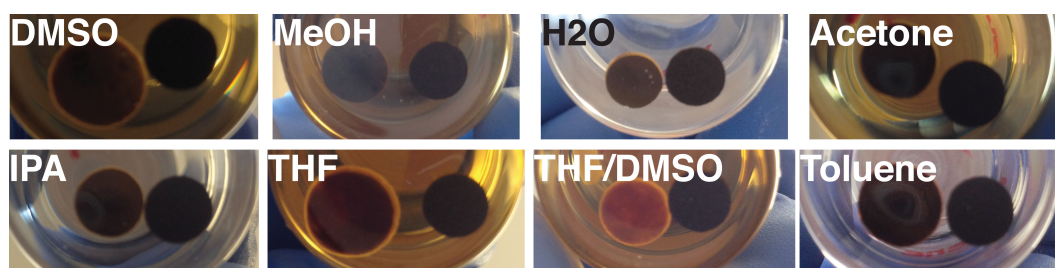

**Figure S3.** Swelling the lignin-C/R-elastomer with different solvent. The diameter ratios before and after swelling are list sequently: 1.32, 1.14, 1.00, 1.12, 1.00, 1.29, 1.41, 1.23, and 1.24 (left is the elastomer swell in solvent, right is control).

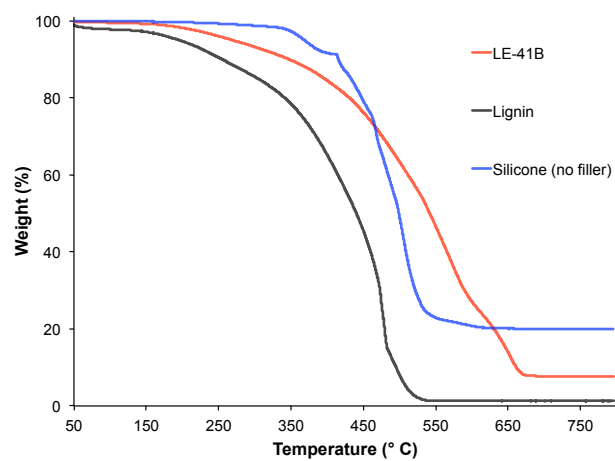

**Figure S4.** TGA thermograms of LE-41B (red), lignin (blue), and silicone (black) under air atmosphere
